# Supplementary material
Source: publisher figshare collection journal article supplement (https://acs.figshare.com/ndownloader/files/3889357)
Supplement: Supplementary file 1 [file 3889357]

  
data_orish2lm 
  
_audit_creation_method            SHELXL-97 
_chemical_name_systematic 
; 
 ? 
; 
_chemical_name_common             ? 
_chemical_melting_point           ? 
_chemical_formula_moiety          'C44 H50 O7, 2(C2 H3 N)'
_chemical_formula_sum 
 'C48 H56 N2 O7' 
_chemical_formula_weight          772.95 
  
loop_ 
 _atom_type_symbol 
 _atom_type_description 
 _atom_type_scat_dispersion_real 
 _atom_type_scat_dispersion_imag 
 _atom_type_scat_source 
 'C'  'C'   0.0033   0.0016 
 'International Tables Vol C Tables 4.2.6.8 and 6.1.1.4' 
 'H'  'H'   0.0000   0.0000 
 'International Tables Vol C Tables 4.2.6.8 and 6.1.1.4' 
 'N'  'N'   0.0061   0.0033 
 'International Tables Vol C Tables 4.2.6.8 and 6.1.1.4' 
 'O'  'O'   0.0106   0.0060 
 'International Tables Vol C Tables 4.2.6.8 and 6.1.1.4' 
  
_symmetry_cell_setting            Triclinic 
_symmetry_space_group_name_H-M    P-1 
_symmetry_space_group_name_Hall '-P 1'
  
loop_ 
 _symmetry_equiv_pos_as_xyz 
 'x, y, z' 
 '-x, -y, -z' 
  
_cell_length_a                    9.731(3) 
_cell_length_b                    9.869(2) 
_cell_length_c                    12.300(2) 
_cell_angle_alpha                 71.031(2) 
_cell_angle_beta                  73.507(2) 
_cell_angle_gamma                 78.962(3) 
_cell_volume                      1064.6(3) 
_cell_formula_units_Z             1 
_cell_measurement_temperature     173(1) 
_cell_measurement_reflns_used     ? 
_cell_measurement_theta_min       ? 
_cell_measurement_theta_max       ? 
  
_exptl_crystal_description        plate 
_exptl_crystal_colour             colorless 
_exptl_crystal_size_max           0.41 
_exptl_crystal_size_mid           0.31 
_exptl_crystal_size_min           0.07 
_exptl_crystal_density_meas       ? 
_exptl_crystal_density_diffrn     1.206 
_exptl_crystal_density_method     'not measured' 
_exptl_crystal_F_000              414 
_exptl_absorpt_coefficient_mu     0.080 
_exptl_absorpt_correction_type    'multi-scan'
_exptl_absorpt_correction_T_min   0.9679 
_exptl_absorpt_correction_T_max   0.9942 
_exptl_absorpt_process_details    'Bruker SADABS V2.05' 
  
_exptl_special_details 
; 
 ? 
; 
  
_diffrn_ambient_temperature       173(1) 
_diffrn_radiation_wavelength      0.71073 
_diffrn_radiation_type            MoK\a 
_diffrn_radiation_source          'fine-focus sealed tube' 
_diffrn_radiation_monochromator   graphite 
_diffrn_measurement_device_type   'CCD area detector' 
_diffrn_measurement_method        'phi and omega scans' 
_diffrn_detector_area_resol_mean  ? 
_diffrn_standards_number          ? 
_diffrn_standards_interval_count  ? 
_diffrn_standards_interval_time   ? 
_diffrn_standards_decay_%         ? 
_diffrn_reflns_number             11910 
_diffrn_reflns_av_R_equivalents   0.0334 
_diffrn_reflns_av_sigmaI/netI     0.0424 
_diffrn_reflns_limit_h_min        -12 
_diffrn_reflns_limit_h_max        12 
_diffrn_reflns_limit_k_min        -12 
_diffrn_reflns_limit_k_max        12 
_diffrn_reflns_limit_l_min        -15 
_diffrn_reflns_limit_l_max        15 
_diffrn_reflns_theta_min          2.41 
_diffrn_reflns_theta_max          27.00 
_reflns_number_total              4602 
_reflns_number_gt                 4176 
_reflns_threshold_expression      >2sigma(I) 
  
_computing_data_collection        'Bruker SMART' 
_computing_cell_refinement        'Bruker SMART' 
_computing_data_reduction         'Bruker SAINT' 
_computing_structure_solution     'SHELXS-97 (Sheldrick, 1990)' 
_computing_structure_refinement   'SHELXL-97 (Sheldrick, 1997)' 
_computing_molecular_graphics     'Bruker SHELXTL' 
_computing_publication_material   'Bruker SHELXTL' 
  
_refine_special_details 
; 
 Refinement of F^2^ against ALL reflections.  The weighted R-factor wR and 
 goodness of fit S are based on F^2^, conventional R-factors R are based 
 on F, with F set to zero for negative F^2^. The threshold expression of 
 F^2^ > 2sigma(F^2^) is used only for calculating R-factors(gt) etc. and is 
 not relevant to the choice of reflections for refinement.  R-factors based 
 on F^2^ are statistically about twice as large as those based on F, and R- 
 factors based on ALL data will be even larger. 
; 
  
_refine_ls_structure_factor_coef  Fsqd 
_refine_ls_matrix_type            full 
_refine_ls_weighting_scheme       calc 
_refine_ls_weighting_details 
 'calc w=1/[\s^2^(Fo^2^)+(0.0527P)^2^+1.4268P] where P=(Fo^2^+2Fc^2^)/3' 
_atom_sites_solution_primary      direct 
_atom_sites_solution_secondary    difmap 
_atom_sites_solution_hydrogens    geom 
_refine_ls_hydrogen_treatment     mixed 
_refine_ls_extinction_method      none 
_refine_ls_extinction_coef        ? 
_refine_ls_number_reflns          4602 
_refine_ls_number_parameters      271 
_refine_ls_number_restraints      0 
_refine_ls_R_factor_all           0.1035 
_refine_ls_R_factor_gt            0.0943 
_refine_ls_wR_factor_ref          0.1997 
_refine_ls_wR_factor_gt           0.1947 
_refine_ls_goodness_of_fit_ref    1.239 
_refine_ls_restrained_S_all       1.239 
_refine_ls_shift/su_max           0.000 
_refine_ls_shift/su_mean          0.000 
  
loop_ 
 _atom_site_label 
 _atom_site_type_symbol 
 _atom_site_fract_x 
 _atom_site_fract_y 
 _atom_site_fract_z 
 _atom_site_U_iso_or_equiv 
 _atom_site_adp_type 
 _atom_site_occupancy 
 _atom_site_symmetry_multiplicity 
 _atom_site_calc_flag 
 _atom_site_refinement_flags 
 _atom_site_disorder_assembly 
 _atom_site_disorder_group 
C1 C 0.8572(3) 1.1510(3) 0.1280(2) 0.0223(6) Uani 1 1 d . . . 
C2 C 0.7543(3) 1.2535(3) 0.0784(2) 0.0206(5) Uani 1 1 d . . . 
C3 C 0.6091(3) 1.2470(3) 0.1339(2) 0.0217(6) Uani 1 1 d . . . 
H3 H 0.5406 1.3206 0.1020 0.026 Uiso 1 1 calc R . . 
C4 C 0.5605(3) 1.1365(3) 0.2345(2) 0.0202(5) Uani 1 1 d . . . 
C5 C 0.6650(3) 1.0357(3) 0.2810(2) 0.0211(5) Uani 1 1 d . . . 
H5 H 0.6350 0.9585 0.3494 0.025 Uiso 1 1 calc R . . 
C6 C 0.8120(3) 1.0428(3) 0.2317(2) 0.0211(5) Uani 1 1 d . B . 
C7 C 0.3981(3) 1.1337(3) 0.2938(2) 0.0234(6) Uani 1 1 d . . . 
C8 C 0.3135(3) 1.1538(3) 0.2010(3) 0.0284(6) Uani 1 1 d . . . 
H8A H 0.2108 1.1497 0.2397 0.043 Uiso 1 1 calc R . . 
H8B H 0.3481 1.0770 0.1623 0.043 Uiso 1 1 calc R . . 
H8C H 0.3274 1.2476 0.1417 0.043 Uiso 1 1 calc R . . 
C9 C 0.3486(3) 1.2562(4) 0.3509(3) 0.0390(8) Uani 1 1 d . . . 
H9A H 0.4036 1.2435 0.4097 0.058 Uiso 1 1 calc R . . 
H9B H 0.2457 1.2553 0.3898 0.058 Uiso 1 1 calc R . . 
H9C H 0.3648 1.3485 0.2899 0.058 Uiso 1 1 calc R . . 
C10 C 0.3659(3) 0.9895(4) 0.3875(3) 0.0361(7) Uani 1 1 d . . . 
H10A H 0.4126 0.9764 0.4517 0.054 Uiso 1 1 calc R . . 
H10B H 0.4031 0.9106 0.3513 0.054 Uiso 1 1 calc R . . 
H10C H 0.2615 0.9893 0.4194 0.054 Uiso 1 1 calc R . . 
C11 C 0.9177(3) 0.9350(3) 0.2953(2) 0.0215(5) Uani 1 1 d . . . 
H11A H 1.0082 0.9791 0.2755 0.026 Uiso 0.50 1 calc PR A 1 
H11B H 0.8772 0.9158 0.3817 0.026 Uiso 0.50 1 calc PR A 1 
C12 C 0.9535(3) 0.7932(3) 0.2661(2) 0.0199(5) Uani 1 1 d . B . 
C13 C 0.8776(3) 0.6764(3) 0.3355(2) 0.0197(5) Uani 1 1 d . . . 
H13 H 0.8022 0.6875 0.4018 0.024 Uiso 1 1 calc R B . 
C14 C 0.9077(3) 0.5440(3) 0.3117(2) 0.0190(5) Uani 1 1 d . B . 
C15 C 1.0158(3) 0.5333(3) 0.2122(2) 0.0217(6) Uani 1 1 d . . . 
H15 H 1.0381 0.4442 0.1936 0.026 Uiso 1 1 calc R B . 
C16 C 1.0932(3) 0.6485(3) 0.1384(2) 0.0228(6) Uani 1 1 d . B . 
C17 C 1.0636(3) 0.7774(3) 0.1686(2) 0.0203(5) Uani 1 1 d . . . 
C18 C 0.8222(3) 0.4172(3) 0.3919(2) 0.0262(6) Uani 1 1 d . . . 
C22 C 1.2066(3) 0.6241(3) 0.0319(3) 0.0271(6) Uani 1 1 d . . . 
C19 C 0.6878(6) 0.4267(8) 0.3535(6) 0.130(3) Uani 1 1 d . B . 
H19A H 0.7115 0.4399 0.2680 0.194 Uiso 1 1 calc R . . 
H19B H 0.6214 0.5088 0.3719 0.194 Uiso 1 1 calc R . . 
H19C H 0.6422 0.3376 0.3954 0.194 Uiso 1 1 calc R . . 
C20 C 0.7880(7) 0.4125(5) 0.5189(3) 0.093(2) Uani 1 1 d . B . 
H20A H 0.7206 0.4966 0.5314 0.139 Uiso 1 1 calc R . . 
H20B H 0.8769 0.4136 0.5409 0.139 Uiso 1 1 calc R . . 
H20C H 0.7441 0.3242 0.5680 0.139 Uiso 1 1 calc R . . 
C21 C 0.9065(7) 0.2748(5) 0.3813(6) 0.128(3) Uani 1 1 d . B . 
H21A H 0.8460 0.1967 0.4267 0.192 Uiso 1 1 calc R . . 
H21B H 0.9922 0.2591 0.4125 0.192 Uiso 1 1 calc R . . 
H21C H 0.9361 0.2763 0.2979 0.192 Uiso 1 1 calc R . . 
C1AC C 0.6938(4) 0.7744(5) 0.1010(3) 0.0508(10) Uani 1 1 d . . . 
H1A1 H 0.7279 0.8698 0.0733 0.076 Uiso 1 1 calc R . . 
H1A2 H 0.7454 0.7192 0.0454 0.076 Uiso 1 1 calc R . . 
H1A3 H 0.7117 0.7234 0.1794 0.076 Uiso 1 1 calc R . . 
C2AC C 0.5403(3) 0.7904(4) 0.1083(3) 0.0340(7) Uani 1 1 d . . . 
N1 N 0.4219(3) 0.8065(4) 0.1121(3) 0.0506(8) Uani 1 1 d . . . 
O1 O 0.9988(2) 1.1663(2) 0.07479(19) 0.0297(5) Uani 1 1 d . . . 
H1 H 1.0478 1.0856 0.0901 0.044 Uiso 1 1 calc R . . 
O2 O 1.1397(2) 0.89415(19) 0.10528(17) 0.0251(4) Uani 1 1 d . B . 
H2 H 1.2284 0.8677 0.0977 0.038 Uiso 1 1 calc R . . 
O3 O 1.2677(3) 0.5049(2) 0.0356(2) 0.0483(7) Uani 1 1 d . B . 
O4 O 0.9678(6) 0.9575(5) 0.3610(5) 0.0502(14) Uani 0.50 1 d P B 2 
  
loop_ 
 _atom_site_aniso_label 
 _atom_site_aniso_U_11 
 _atom_site_aniso_U_22 
 _atom_site_aniso_U_33 
 _atom_site_aniso_U_23 
 _atom_site_aniso_U_13 
 _atom_site_aniso_U_12 
C1 0.0199(13) 0.0196(13) 0.0250(14) -0.0078(11) -0.0001(10) -0.0023(10) 
C2 0.0216(13) 0.0168(12) 0.0200(13) -0.0056(10) -0.0001(10) -0.0008(10) 
C3 0.0224(13) 0.0170(12) 0.0231(13) -0.0048(10) -0.0053(11) 0.0019(10) 
C4 0.0216(13) 0.0216(13) 0.0188(12) -0.0081(10) -0.0021(10) -0.0058(10) 
C5 0.0251(14) 0.0195(12) 0.0160(12) -0.0013(10) -0.0026(10) -0.0063(10) 
C6 0.0238(13) 0.0187(12) 0.0208(13) -0.0073(10) -0.0042(10) -0.0011(10) 
C7 0.0195(13) 0.0290(14) 0.0188(13) -0.0044(11) -0.0012(10) -0.0055(11) 
C8 0.0235(14) 0.0317(15) 0.0281(15) -0.0036(12) -0.0082(12) -0.0041(12) 
C9 0.0247(15) 0.054(2) 0.0420(18) -0.0289(16) 0.0047(13) -0.0068(14) 
C10 0.0219(15) 0.0447(19) 0.0315(16) 0.0050(14) -0.0034(12) -0.0126(13) 
C11 0.0207(13) 0.0216(13) 0.0213(13) -0.0052(11) -0.0049(10) -0.0020(10) 
C12 0.0194(13) 0.0189(12) 0.0199(12) -0.0017(10) -0.0095(10) 0.0016(10) 
C13 0.0148(12) 0.0273(14) 0.0169(12) -0.0064(10) -0.0032(9) -0.0028(10) 
C14 0.0153(12) 0.0221(13) 0.0198(12) -0.0033(10) -0.0054(10) -0.0052(10) 
C15 0.0249(14) 0.0147(12) 0.0219(13) -0.0026(10) -0.0041(11) -0.0006(10) 
C16 0.0197(13) 0.0204(13) 0.0224(13) -0.0029(11) -0.0011(10) -0.0002(10) 
C17 0.0151(12) 0.0182(12) 0.0228(13) 0.0016(10) -0.0053(10) -0.0028(9) 
C18 0.0228(14) 0.0272(14) 0.0260(14) -0.0059(12) 0.0006(11) -0.0097(11) 
C22 0.0234(14) 0.0184(13) 0.0302(15) -0.0036(11) 0.0030(11) -0.0008(11) 
C19 0.095(4) 0.156(6) 0.122(5) 0.065(4) -0.063(4) -0.106(5) 
C20 0.181(6) 0.070(3) 0.029(2) 0.001(2) 0.004(3) -0.091(4) 
C21 0.109(5) 0.031(2) 0.162(6) -0.012(3) 0.092(4) -0.031(3) 
C1AC 0.0259(17) 0.086(3) 0.0391(19) -0.0115(19) -0.0148(15) -0.0039(18) 
C2AC 0.0297(17) 0.0463(19) 0.0291(16) -0.0144(14) -0.0092(13) -0.0015(14) 
N1 0.0242(15) 0.073(2) 0.062(2) -0.0315(18) -0.0117(14) 0.0005(14) 
O1 0.0174(10) 0.0216(10) 0.0382(12) 0.0012(9) -0.0001(8) -0.0014(8) 
O2 0.0173(9) 0.0178(9) 0.0331(11) -0.0030(8) 0.0006(8) -0.0031(7) 
O3 0.0508(15) 0.0173(10) 0.0434(14) 0.0014(9) 0.0209(11) 0.0077(10) 
O4 0.074(4) 0.036(3) 0.065(3) -0.030(2) -0.048(3) 0.013(2) 
  
_geom_special_details 
; 
 All esds (except the esd in the dihedral angle between two l.s. planes) 
 are estimated using the full covariance matrix.  The cell esds are taken 
 into account individually in the estimation of esds in distances, angles 
 and torsion angles; correlations between esds in cell parameters are only 
 used when they are defined by crystal symmetry.  An approximate (isotropic) 
 treatment of cell esds is used for estimating esds involving l.s. planes. 
; 
  
loop_ 
 _geom_bond_atom_site_label_1 
 _geom_bond_atom_site_label_2 
 _geom_bond_distance 
 _geom_bond_site_symmetry_2 
 _geom_bond_publ_flag 
C1 O1 1.361(3) . ? 
C1 C6 1.391(4) . ? 
C1 C2 1.398(4) . ? 
C2 C3 1.387(4) . ? 
C2 C22 1.504(4) 2_775 ? 
C3 C4 1.390(4) . ? 
C3 H3 0.9500 . ? 
C4 C5 1.387(4) . ? 
C4 C7 1.542(4) . ? 
C5 C6 1.392(4) . ? 
C5 H5 0.9500 . ? 
C6 C11 1.516(4) . ? 
C7 C9 1.525(4) . ? 
C7 C8 1.531(4) . ? 
C7 C10 1.534(4) . ? 
C8 H8A 0.9800 . ? 
C8 H8B 0.9800 . ? 
C8 H8C 0.9800 . ? 
C9 H9A 0.9800 . ? 
C9 H9B 0.9800 . ? 
C9 H9C 0.9800 . ? 
C10 H10A 0.9800 . ? 
C10 H10B 0.9800 . ? 
C10 H10C 0.9800 . ? 
C11 O4 1.150(5) . ? 
C11 C12 1.510(4) . ? 
C11 H11A 0.9900 . ? 
C11 H11B 0.9900 . ? 
C12 C13 1.389(4) . ? 
C12 C17 1.392(4) . ? 
C13 C14 1.390(4) . ? 
C13 H13 0.9500 . ? 
C14 C15 1.387(4) . ? 
C14 C18 1.537(4) . ? 
C15 C16 1.398(4) . ? 
C15 H15 0.9500 . ? 
C16 C17 1.395(4) . ? 
C16 C22 1.508(4) . ? 
C17 O2 1.378(3) . ? 
C18 C19 1.488(5) . ? 
C18 C20 1.489(5) . ? 
C18 C21 1.511(5) . ? 
C22 O3 1.205(3) . ? 
C22 C2 1.504(4) 2_775 ? 
C19 H19A 0.9800 . ? 
C19 H19B 0.9800 . ? 
C19 H19C 0.9800 . ? 
C20 H20A 0.9800 . ? 
C20 H20B 0.9800 . ? 
C20 H20C 0.9800 . ? 
C21 H21A 0.9800 . ? 
C21 H21B 0.9800 . ? 
C21 H21C 0.9800 . ? 
C1AC C2AC 1.451(4) . ? 
C1AC H1A1 0.9800 . ? 
C1AC H1A2 0.9800 . ? 
C1AC H1A3 0.9800 . ? 
C2AC N1 1.122(4) . ? 
O1 H1 0.8400 . ? 
O2 H2 0.8400 . ? 
  
loop_ 
 _geom_angle_atom_site_label_1 
 _geom_angle_atom_site_label_2 
 _geom_angle_atom_site_label_3 
 _geom_angle 
 _geom_angle_site_symmetry_1 
 _geom_angle_site_symmetry_3 
 _geom_angle_publ_flag 
O1 C1 C6 122.8(2) . . ? 
O1 C1 C2 117.8(2) . . ? 
C6 C1 C2 119.3(2) . . ? 
C3 C2 C1 119.7(2) . . ? 
C3 C2 C22 117.3(2) . 2_775 ? 
C1 C2 C22 123.0(2) . 2_775 ? 
C2 C3 C4 122.2(2) . . ? 
C2 C3 H3 118.9 . . ? 
C4 C3 H3 118.9 . . ? 
C5 C4 C3 116.7(2) . . ? 
C5 C4 C7 122.6(2) . . ? 
C3 C4 C7 120.5(2) . . ? 
C4 C5 C6 122.8(2) . . ? 
C4 C5 H5 118.6 . . ? 
C6 C5 H5 118.6 . . ? 
C1 C6 C5 119.1(2) . . ? 
C1 C6 C11 122.2(2) . . ? 
C5 C6 C11 118.7(2) . . ? 
C9 C7 C8 109.7(2) . . ? 
C9 C7 C10 109.8(3) . . ? 
C8 C7 C10 107.2(2) . . ? 
C9 C7 C4 108.4(2) . . ? 
C8 C7 C4 110.0(2) . . ? 
C10 C7 C4 111.8(2) . . ? 
C7 C8 H8A 109.5 . . ? 
C7 C8 H8B 109.5 . . ? 
H8A C8 H8B 109.5 . . ? 
C7 C8 H8C 109.5 . . ? 
H8A C8 H8C 109.5 . . ? 
H8B C8 H8C 109.5 . . ? 
C7 C9 H9A 109.5 . . ? 
C7 C9 H9B 109.5 . . ? 
H9A C9 H9B 109.5 . . ? 
C7 C9 H9C 109.5 . . ? 
H9A C9 H9C 109.5 . . ? 
H9B C9 H9C 109.5 . . ? 
C7 C10 H10A 109.5 . . ? 
C7 C10 H10B 109.5 . . ? 
H10A C10 H10B 109.5 . . ? 
C7 C10 H10C 109.5 . . ? 
H10A C10 H10C 109.5 . . ? 
H10B C10 H10C 109.5 . . ? 
O4 C11 C12 121.6(3) . . ? 
O4 C11 C6 123.5(3) . . ? 
C12 C11 C6 114.8(2) . . ? 
O4 C11 H11A 53.8 . . ? 
C12 C11 H11A 108.6 . . ? 
C6 C11 H11A 108.6 . . ? 
O4 C11 H11B 53.7 . . ? 
C12 C11 H11B 108.6 . . ? 
C6 C11 H11B 108.6 . . ? 
H11A C11 H11B 107.5 . . ? 
C13 C12 C17 118.8(2) . . ? 
C13 C12 C11 120.9(2) . . ? 
C17 C12 C11 120.3(2) . . ? 
C12 C13 C14 122.5(2) . . ? 
C12 C13 H13 118.7 . . ? 
C14 C13 H13 118.7 . . ? 
C15 C14 C13 117.0(2) . . ? 
C15 C14 C18 122.3(2) . . ? 
C13 C14 C18 120.7(2) . . ? 
C14 C15 C16 122.6(2) . . ? 
C14 C15 H15 118.7 . . ? 
C16 C15 H15 118.7 . . ? 
C17 C16 C15 118.4(2) . . ? 
C17 C16 C22 124.0(2) . . ? 
C15 C16 C22 117.5(2) . . ? 
O2 C17 C12 116.8(2) . . ? 
O2 C17 C16 122.7(2) . . ? 
C12 C17 C16 120.5(2) . . ? 
C19 C18 C20 110.7(4) . . ? 
C19 C18 C21 106.2(5) . . ? 
C20 C18 C21 107.2(4) . . ? 
C19 C18 C14 109.7(3) . . ? 
C20 C18 C14 111.8(3) . . ? 
C21 C18 C14 111.1(2) . . ? 
O3 C22 C2 119.5(2) . 2_775 ? 
O3 C22 C16 119.5(2) . . ? 
C2 C22 C16 121.0(2) 2_775 . ? 
C18 C19 H19A 109.5 . . ? 
C18 C19 H19B 109.5 . . ? 
H19A C19 H19B 109.5 . . ? 
C18 C19 H19C 109.5 . . ? 
H19A C19 H19C 109.5 . . ? 
H19B C19 H19C 109.5 . . ? 
C18 C20 H20A 109.5 . . ? 
C18 C20 H20B 109.5 . . ? 
H20A C20 H20B 109.5 . . ? 
C18 C20 H20C 109.5 . . ? 
H20A C20 H20C 109.5 . . ? 
H20B C20 H20C 109.5 . . ? 
C18 C21 H21A 109.5 . . ? 
C18 C21 H21B 109.5 . . ? 
H21A C21 H21B 109.5 . . ? 
C18 C21 H21C 109.5 . . ? 
H21A C21 H21C 109.5 . . ? 
H21B C21 H21C 109.5 . . ? 
C2AC C1AC H1A1 109.5 . . ? 
C2AC C1AC H1A2 109.5 . . ? 
H1A1 C1AC H1A2 109.5 . . ? 
C2AC C1AC H1A3 109.5 . . ? 
H1A1 C1AC H1A3 109.5 . . ? 
H1A2 C1AC H1A3 109.5 . . ? 
N1 C2AC C1AC 178.1(4) . . ? 
C1 O1 H1 109.5 . . ? 
C17 O2 H2 109.5 . . ? 
  
loop_ 
 _geom_hbond_atom_site_label_D 
 _geom_hbond_atom_site_label_H 
 _geom_hbond_atom_site_label_A 
 _geom_hbond_distance_DH 
 _geom_hbond_distance_HA 
 _geom_hbond_distance_DA 
 _geom_hbond_angle_DHA 
 _geom_hbond_site_symmetry_A 
O2 H2 N1  0.84 1.90 2.733(3) 168.9 1_655 
O1 H1 O2  0.84 1.90 2.732(3) 168.6 . 
  
_diffrn_measured_fraction_theta_max    0.990 
_diffrn_reflns_theta_full              27.00 
_diffrn_measured_fraction_theta_full   0.990 
_refine_diff_density_max    0.478 
_refine_diff_density_min   -0.355 
_refine_diff_density_rms    0.061 
